# Supplementary material for: A polar two-dimensional lead-free hybrid perovskite for self-powered polarization-sensitive photodetection
Source: Royal Society of Chemistry journal article supplement (doi:10.1039/d4qi01035c), 2024-01-01
Supplement: d4qi01035c1.pdf [file d4qi01035c1.pdf]

*Supporting information*

**A Polar Two-Dimensional Lead-Free Hybrid Perovskite for Self-Powered Polarization-Sensitive Photodetection**

*Cheng-Dong Liu, Chang-Chun Fan, Bei-Dou Liang, and Wen Zhang\**

Jiangsu Key Laboratory for Science and Applications of Molecular Ferroelectrics and School of Chemistry and Chemical Engineering, Southeast University, Nanjing 211189, China.

E-mail: zhangwen@seu.edu.cn

## **Experimental Section**

### **General characterizations**

Powder X-ray diffraction (PXRD) patterns were obtained on a Rigaku SmartLab X-ray diffraction instrument. Ultraviolet-vis (UV-vis) absorption spectra were measured with Shimadzu UV-2600 equipped with ISR-2600Plus integrating sphere. The single crystal growth was carried out using a home-made hydrothermal growth system.

### **Single-crystal X-ray Diffraction.**

Crystallographic data of the compound were collected on a Rigaku Oxford Diffraction Supernova Dual Source, Cu at Zero equipped with an AtlasS2 CCD using Mo K $\alpha$  radiation and an XtaLAB Synergy R, DW system, HyPix diffractometer. Rigaku CrysAlisPro software was used to collect data, refine cell, and to reduce data. SHELXL-2018 with the OLEX2 interface was used to solve the structures by direct methods. All non-hydrogen atoms were refined anisotropically. The positions of hydrogen atoms were generated geometrically.

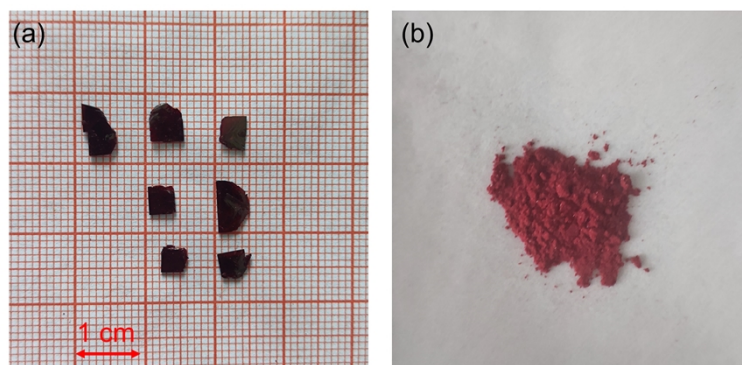

**Figure S1.** (a) Single crystal and (b) powder sample of  $(4\text{BrPEA})_3\text{BiI}_6$ .

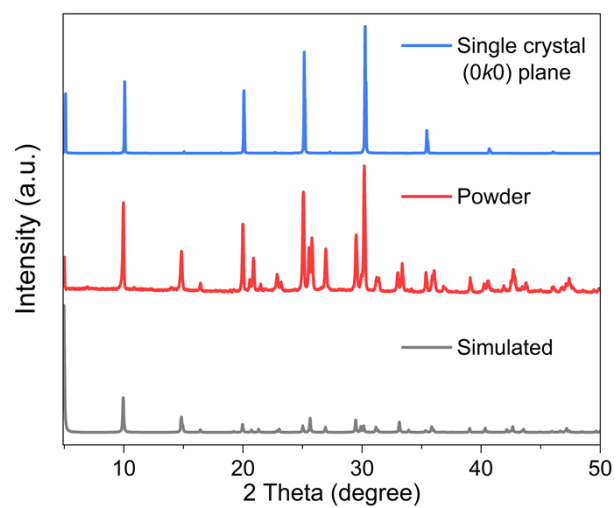

**Figure S2.** PXRD patterns of  $(4\text{BrPEA})_3\text{BiI}_6$  single crystal and powder sample.

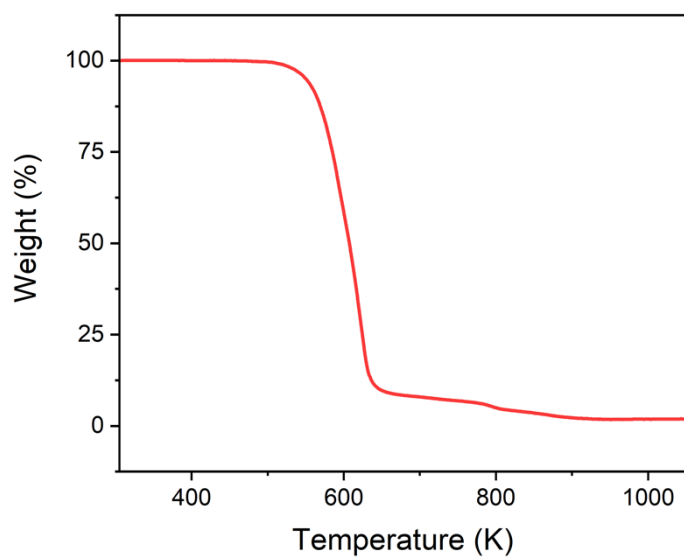

**Figure S3.** Thermogravimetric analysis of  $(4\text{BrPEA})_3\text{BiI}_6$ .

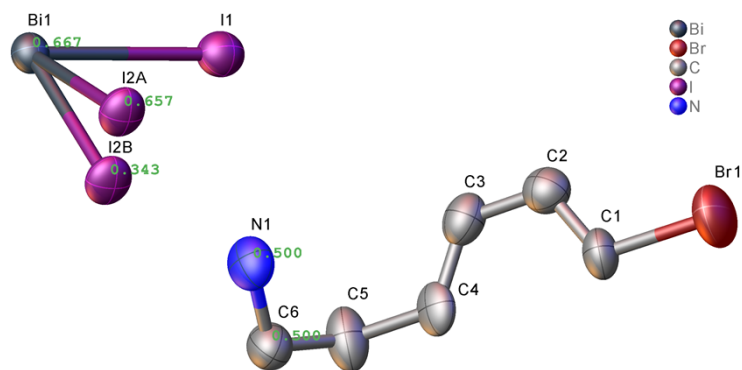

**Figure S4.** The asymmetric unit of  $(4\text{BrPEA})_3\text{BiI}_6$ . The black label represents the atomic number while the green label represents the chemical occupancy.

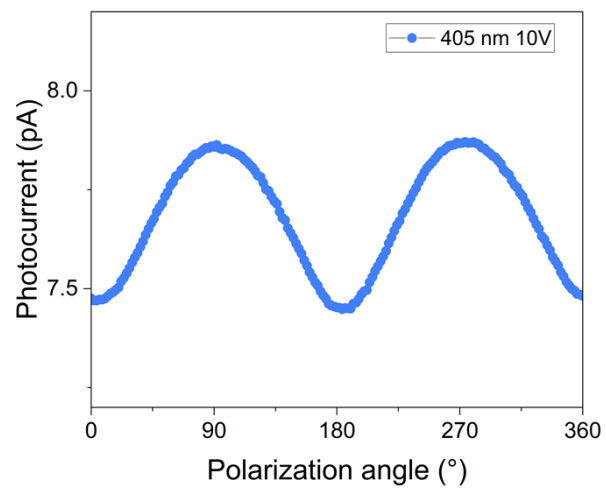

**Figure S5.** Polarization-dependent photocurrent measured at 10 V bias.

**Table S1.** Crystal data and structure refinement details for (4BrPEA)<sub>3</sub>BiI<sub>6</sub>.

|                                                     |                                                                              |
|-----------------------------------------------------|------------------------------------------------------------------------------|
| Empirical formula                                   | C <sub>8</sub> H <sub>11</sub> NBrBi <sub>0.33</sub> I <sub>2</sub>          |
| Formula weight                                      | 524.63                                                                       |
| Temperature / K                                     | 292(2)                                                                       |
| Crystal system                                      | Orthorhombic                                                                 |
| Space group                                         | <i>Fmm2</i>                                                                  |
| a / Å                                               | 8.5646(5)                                                                    |
| b / Å                                               | 35.477(5)                                                                    |
| c / Å                                               | 8.5649(5)                                                                    |
| α / °                                               | 90                                                                           |
| β / °                                               | 90                                                                           |
| γ / °                                               | 90                                                                           |
| Volume / Å <sup>3</sup>                             | 2602.4(4)                                                                    |
| Z                                                   | 8                                                                            |
| ρ <sub>calc</sub> / cm <sup>3</sup>                 | 2.678                                                                        |
| μ / mm <sup>-1</sup>                                | 12.357                                                                       |
| F(000)                                              | 1878.0                                                                       |
| Radiation                                           | Mo Kα (λ = 0.71073)                                                          |
| 2θ range for data collection / °                    | 4.592 to 52.594                                                              |
| Index ranges                                        | -10 ≤ h ≤ 10, -44 ≤ k ≤ 44, -10 ≤ l ≤ 10                                     |
| Reflections collected                               | 6692                                                                         |
| Independent reflections                             | 1418 [ <i>R</i> <sub>int</sub> = 0.0299, <i>R</i> <sub>sigma</sub> = 0.0253] |
| Data/restraints/parameters                          | 1418/3/86                                                                    |
| Goodness-of-fit on F <sup>2</sup>                   | 1.081                                                                        |
| Final <i>R</i> indexes [ <i>I</i> ≥ 2σ( <i>I</i> )] | <i>R</i> <sub>1</sub> = 0.0248, <i>wR</i> <sub>2</sub> = 0.0576              |
| Final <i>R</i> indexes [all data]                   | <i>R</i> <sub>1</sub> = 0.0281, <i>wR</i> <sub>2</sub> = 0.0584              |
| Largest diff. peak/hole / e Å <sup>-3</sup>         | 1.84/-1.49                                                                   |
| Flack parameter                                     | -0.012(12)                                                                   |

$${}^a R_1 = \frac{\sum ||F_o| - |F_c||}{\sum |F_o|}, \quad {}^b wR_2(F^2) = \left[ \frac{\sum w(F_o^2 - F_c^2)^2}{\sum wF_o^4} \right]^{1/2}.$$

**Table S2.** Bond lengths for (4BrPEA)<sub>3</sub>BiI<sub>6</sub>.

| Atom-Atom              | Lengths / Å | Atom-Atom            | lengths / Å |
|------------------------|-------------|----------------------|-------------|
| Bi1-I1                 | 3.1640 (8)  | C3-H3                | 0.9300      |
| Bi1-I1 <sup>i</sup>    | 3.1639 (8)  | C3-C4                | 1.377 (12)  |
| Bi1-I2A <sup>ii</sup>  | 3.0404 (15) | C4-C5                | 1.491 (17)  |
| Bi1-I2A <sup>iii</sup> | 3.0404 (15) | C5-H5A               | 0.9700      |
| Bi1-I2A <sup>i</sup>   | 3.0680 (16) | C5-H5A <sup>iv</sup> | 0.9700      |
| Bi1-I2A                | 3.0680 (16) | C5-H5B               | 0.9700      |
| Bi1-I2B <sup>i</sup>   | 3.109 (2)   | C5-H5B <sup>iv</sup> | 0.9700      |
| Bi1-I2B <sup>iii</sup> | 3.106 (3)   | C5-C6                | 1.494 (17)  |
| Bi1-I2B <sup>ii</sup>  | 3.106 (3)   | N1-H1A               | 0.8900      |
| Bi1-I2B                | 3.109 (2)   | N1-H1B               | 0.8900      |
| Br1-C1                 | 1.892 (12)  | N1-H1C               | 0.8900      |
| C1-C2                  | 1.373 (11)  | N1-C6                | 1.47 (2)    |
| C1-C2 <sup>iv</sup>    | 1.373 (11)  | C6-H6A               | 0.9700      |
| C2-H2                  | 0.9300      | C6-H6B               | 0.9700      |
| C2-C3                  | 1.383 (12)  |                      |             |

Symmetry codes: (i)  $-x+1, -y+1, z$ ; (ii)  $x+1/2, y, z+1/2$ ; (iii)  $-x+1/2, -y+1, z+1/2$ ; (iv)  $-x, y, z$ ; (v)  $x-1/2, y, z-1/2$ .

**Table S3.** Bond angles for (4BrPEA)<sub>3</sub>BiI<sub>6</sub>.

| Atom-Atom-Atom                             | Angle / °   | Atom-Atom-Atom                          | Angle / °  |
|--------------------------------------------|-------------|-----------------------------------------|------------|
| I1 <sup>i</sup> -Bi1-I1                    | 175.99 (5)  | C2 <sup>iv</sup> -C1-C2                 | 122.1 (11) |
| I2A-Bi1-I1                                 | 91.59 (2)   | C1-C2-H2                                | 120.8      |
| I2A-Bi1-I1 <sup>i</sup>                    | 91.59 (2)   | C1-C2-C3                                | 118.4 (9)  |
| I2A <sup>iii</sup> -Bi1-I1 <sup>i</sup>    | 88.782 (16) | C3-C2-H2                                | 120.8      |
| I2A <sup>i</sup> -Bi1-I1 <sup>i</sup>      | 91.59 (2)   | C2-C3-H3                                | 119.6      |
| I2A <sup>iii</sup> -Bi1-I1                 | 88.782 (16) | C4-C3-C2                                | 120.9 (9)  |
| I2A <sup>ii</sup> -Bi1-I1                  | 88.782 (16) | C4-C3-H3                                | 119.6      |
| I2A <sup>ii</sup> -Bi1-I1 <sup>i</sup>     | 88.782 (16) | C3 <sup>iv</sup> -C4-C3                 | 119.3 (12) |
| I2A <sup>i</sup> -Bi1-I1                   | 91.59 (2)   | C3 <sup>iv</sup> -C4-C5                 | 120.3 (6)  |
| I2A <sup>ii</sup> -Bi1-I2A <sup>i</sup>    | 89.934 (9)  | C3-C4-C5                                | 120.3 (6)  |
| I2A <sup>ii</sup> -Bi1-I2A <sup>iii</sup>  | 105.06 (8)  | C4-C5-H5A <sup>iv</sup>                 | 108.5 (4)  |
| I2A <sup>i</sup> -Bi1-I2A                  | 75.07 (8)   | C4-C5-H5A                               | 108.5      |
| I2A <sup>iii</sup> -Bi1-I2A <sup>i</sup>   | 165.01 (8)  | C4-C5-H5B                               | 108.5      |
| I2A <sup>ii</sup> -Bi1-I2A                 | 165.01 (8)  | C4-C5-H5B <sup>iv</sup>                 | 108.5 (2)  |
| I2A <sup>iii</sup> -Bi1-I2A                | 89.934 (9)  | C4-C5-C6                                | 114.9 (11) |
| I2A <sup>i</sup> -Bi1-I2B <sup>ii</sup>    | 110.47 (5)  | H5A-C5-H5A <sup>iv</sup>                | 91.6       |
| I2A <sup>ii</sup> -Bi1-I2B <sup>iii</sup>  | 84.52 (10)  | H5A-C5-H5B                              | 107.5      |
| I2A <sup>ii</sup> -Bi1-I2B <sup>i</sup>    | 69.48 (5)   | H5A <sup>iv</sup> -C5-H5B <sup>iv</sup> | 107.5      |
| I2A-Bi1-I2B <sup>i</sup>                   | 95.53 (10)  | H5A-C5-H5B <sup>iv</sup>                | 17.4       |
| I2A-Bi1-I2B <sup>iii</sup>                 | 110.47 (5)  | H5B-C5-H5A <sup>iv</sup>                | 17.4       |
| I2A-Bi1-I2B <sup>ii</sup>                  | 174.45 (10) | H5B-C5-H5B <sup>iv</sup>                | 122.3      |
| I2A <sup>iii</sup> -Bi1-I2B <sup>ii</sup>  | 84.52 (10)  | C6-C5-H5A <sup>iv</sup>                 | 121.7 (14) |
| I2A <sup>i</sup> -Bi1-I2B <sup>i</sup>     | 20.46 (5)   | C6-C5-H5A                               | 108.5      |
| I2A <sup>iii</sup> -Bi1-I2B <sup>iii</sup> | 20.54 (5)   | C6-C5-H5B                               | 108.5      |

|                                          |             |                         |            |
|------------------------------------------|-------------|-------------------------|------------|
| I2A <sup>ii</sup> -Bi1-I2B <sup>ii</sup> | 20.54 (5)   | C6-C5-H5B <sup>iv</sup> | 93.7 (13)  |
| I2A <sup>i</sup> -Bi1-I2B <sup>iii</sup> | 174.45 (10) | H1A-N1-H1B              | 109.5      |
| I2A <sup>iii</sup> -Bi1-I2B <sup>i</sup> | 174.53 (10) | H1A-N1-H1C              | 109.5      |
| I2B <sup>ii</sup> -Bi1-I1                | 88.30 (2)   | H1B-N1-H1C              | 109.5      |
| I2B-Bi1-I1                               | 91.061 (14) | C6-N1-H1A               | 109.5      |
| I2B <sup>iii</sup> -Bi1-I1               | 88.30 (2)   | C6-N1-H1B               | 109.5      |
| I2B <sup>i</sup> -Bi1-I1                 | 91.061 (14) | C6-N1-H1C               | 109.5      |
| I2B <sup>ii</sup> -Bi1-I2B               | 154.00 (14) | C5-C6-H6A               | 108.4      |
| I2B <sup>iii</sup> -Bi1-I2B              | 90.02 (2)   | C5-C6-H6B               | 108.4      |
| Bi1 <sup>v</sup> -I2A-Bi1                | 165.01 (8)  | N1-C6-C5                | 115.4 (19) |
| Bi1 <sup>v</sup> -I2B-Bi1                | 154.00 (13) | N1-C6-H6A               | 108.4      |
| C2-C1-Br1                                | 119.0 (6)   | N1-C6-H6B               | 108.4      |
| C2 <sup>iv</sup> -C1-Br1                 | 119.0 (6)   | H6A-C6-H6B              | 107.5      |

Symmetry codes: (i)  $-x+1, -y+1, z$ ; (ii)  $x+1/2, y, z+1/2$ ; (iii)  $-x+1/2, -y+1, z+1/2$ ; (iv)  $-x, y, z$ ; (v)  $x-1/2, y, z-1/2$ .

**Table S4.** N-H $\cdots$ I hydrogen bond lengths extracted from the crystal structure of (4FPEA)<sub>3</sub>BiI<sub>6</sub> and (4BrPEA)<sub>3</sub>BiI<sub>6</sub>.

| (4FPEA) <sub>3</sub> BiI <sub>6</sub> | (4BrPEA) <sub>3</sub> BiI <sub>6</sub> |
|---------------------------------------|----------------------------------------|
| 2.738 Å                               | 2.753 Å                                |
| 2.77 Å                                | 2.827 Å                                |
| 2.807 Å                               | 3.065 Å                                |
| 2.842 Å                               | 3.092 Å                                |
| 2.904 Å                               | 3.162 Å                                |
| 2.928 Å                               |                                        |
| 2.945 Å                               |                                        |
| 2.992 Å                               |                                        |
| 2.993 Å                               |                                        |
| 3.087 Å                               |                                        |
